# Supplementary material for: Sorafenib Resistance Contributed by IL7 and MAL2 in Hepatocellular Carcinoma Can Be Overcome by Autophagy-Inducing Stapled Peptides
Source: MDPI journal article supplement (doi:10.3390/cancers15215280), 2023-11-03

Figure 4A

PLC/PRF/5 GFP

The first time

The second time

The third time

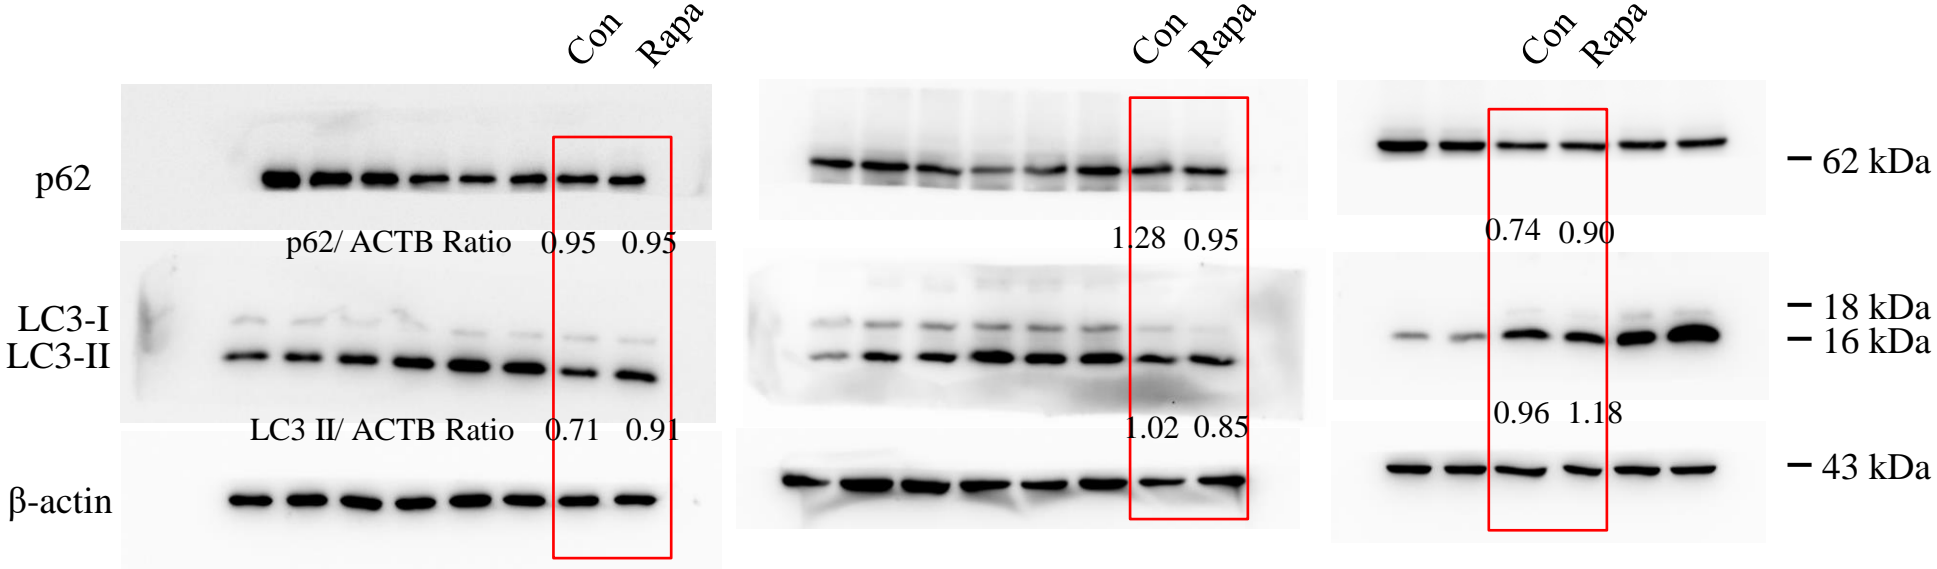

PLC/PRF/5 IL7 & MAL2

The first time

The second time

The third time

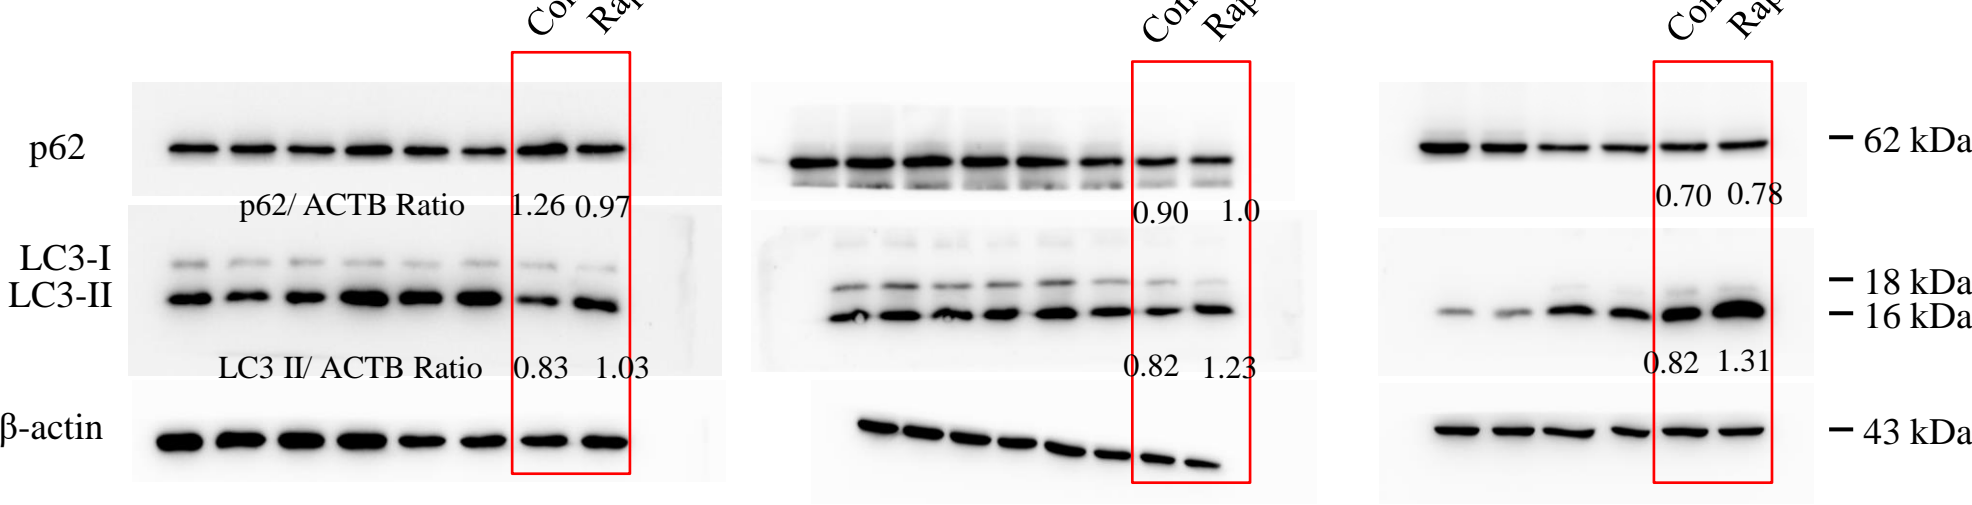

PLC/PRF/5 GFP

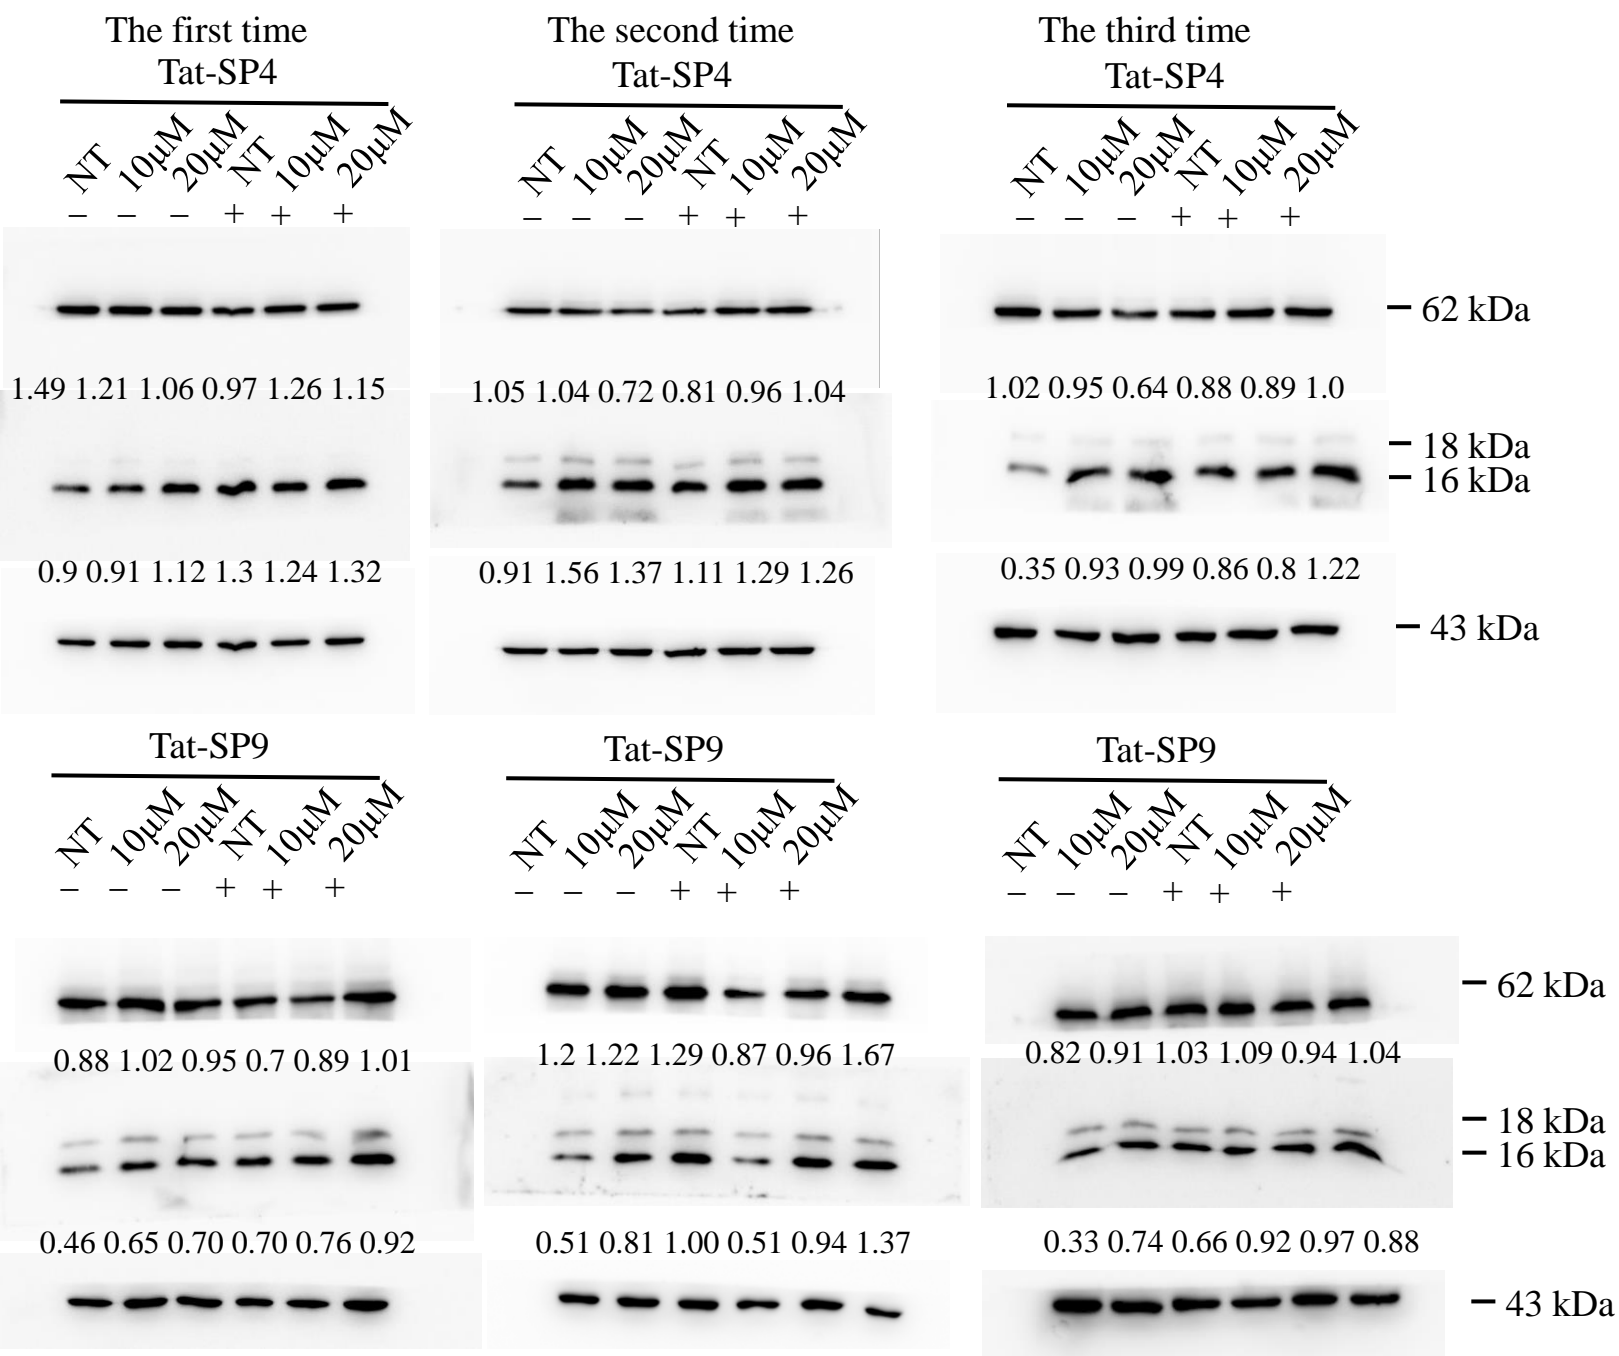

PLC/PRF/5 IL7 &amp; MAL2

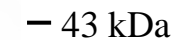

Supplement: s1 [file s1]
